# Supplementary material for: Testosterone Therapy for Late-Onset Hypogonadism: A Clinical, Biological, and Analytical Approach Using Compounded Testosterone 0.5–20% Topical Gels
Source: MDPI journal article supplement (doi:10.3390/pharmaceutics16050621), 2024-05-06
Supplement: s1 [file s1]

## Supplementary Materials

**Table S1.** This table provides the description, acceptance criteria, and result from each parameter evaluated in the UPLC assay method validation. System suitability, linearity, accuracy, repeatability, intermediate precision, robustness, solution stability, and specificity of the method were evaluated as parts of the validation. Only when all parameters achieved the acceptable criteria, the method was considered accurate, precise, robust, and stability-indicating.

| Validation parameters     | Description                                                                                               | Acceptance criteria                                                                                                                                                                                                                                          | Results                                |                   |
|---------------------------|-----------------------------------------------------------------------------------------------------------|--------------------------------------------------------------------------------------------------------------------------------------------------------------------------------------------------------------------------------------------------------------|----------------------------------------|-------------------|
| <b>System suitability</b> | Ensures the chromatographic system is adequate for the assay analysis.                                    | <ul style="list-style-type: none"> <li>- Relative Standard Deviation (RSD) <math>\leq</math> 1.0%</li> <li>- Tailing factor <math>\leq</math> 2.0</li> <li>- Column efficiency <math>\geq</math> 2000</li> <li>- Resolution <math>\geq</math> 2.0</li> </ul> | RSD                                    | 0.3%              |
|                           |                                                                                                           |                                                                                                                                                                                                                                                              | Tailing factor                         | 1.25              |
|                           |                                                                                                           |                                                                                                                                                                                                                                                              | Column efficiency                      | 33456             |
|                           |                                                                                                           |                                                                                                                                                                                                                                                              | Resolution                             | n/a               |
| <b>Linearity</b>          | Verifies if the concentration-response relationship is directly proportional within the given range.      | <ul style="list-style-type: none"> <li>- <math>R^2 \geq 0.995</math></li> <li>- y-intercept <math>\leq</math> 1.5% of target concentration</li> <li>- Residuals <math>\leq</math> 1.5% of target concentration</li> </ul>                                    | Regression line                        | 6569.6 x + 1264.7 |
|                           |                                                                                                           |                                                                                                                                                                                                                                                              | $R^2$                                  | 1                 |
|                           |                                                                                                           |                                                                                                                                                                                                                                                              | y-intercept                            | 0.3%              |
|                           |                                                                                                           |                                                                                                                                                                                                                                                              | Maximum residual                       | 0.59%             |
| <b>Accuracy</b>           | Establishes the closeness of the test results obtained by the analytical procedure to the expected value. | At 80%, 100%, and 120% of target concentration:<br>- $98.0\% \leq \text{recovery} \leq 102.0\%$                                                                                                                                                              | <i>Testosterone 0.5% gel (placebo)</i> |                   |
|                           |                                                                                                           |                                                                                                                                                                                                                                                              | Recovery at 80%                        | 100.725%          |
|                           |                                                                                                           |                                                                                                                                                                                                                                                              | Recovery at 100%                       | 101.213%          |
|                           |                                                                                                           |                                                                                                                                                                                                                                                              | Recovery at 120%                       | 100.954%          |
|                           |                                                                                                           |                                                                                                                                                                                                                                                              | <i>Testosterone 20% gel (placebo)</i>  |                   |

|                                  |                                                                                                                                      |                                                                                                                                                                                                          |                                        |                         |
|----------------------------------|--------------------------------------------------------------------------------------------------------------------------------------|----------------------------------------------------------------------------------------------------------------------------------------------------------------------------------------------------------|----------------------------------------|-------------------------|
|                                  |                                                                                                                                      |                                                                                                                                                                                                          | Recovery at 80%                        | 100.595%                |
|                                  |                                                                                                                                      |                                                                                                                                                                                                          | Recovery at 100%                       | 101.022%                |
|                                  |                                                                                                                                      |                                                                                                                                                                                                          | Recovery at 120%                       | 100.845%                |
| <b>Precision (repeatability)</b> | Determines the closeness of agreement among a series of measurements obtained from multiple sampling of the same homogeneous sample. | At 80%, 100%, and 120% from accuracy determination:<br>- $\text{RSD} \leq 2.0\%$                                                                                                                         | <i>Testosterone 0.5% gel (placebo)</i> |                         |
|                                  |                                                                                                                                      |                                                                                                                                                                                                          | RSD at 80%                             | 0.3%                    |
|                                  |                                                                                                                                      |                                                                                                                                                                                                          | RSD at 100%                            | 0.7%                    |
|                                  |                                                                                                                                      |                                                                                                                                                                                                          | RSD at 120%                            | 0.3%                    |
|                                  |                                                                                                                                      |                                                                                                                                                                                                          | <i>Testosterone 20% gel (placebo)</i>  |                         |
|                                  |                                                                                                                                      |                                                                                                                                                                                                          | RSD at 80%                             | 0.5%                    |
|                                  |                                                                                                                                      |                                                                                                                                                                                                          | RSD at 100%                            | 0.3%                    |
|                                  |                                                                                                                                      |                                                                                                                                                                                                          | RSD at 120%                            | 0.5%                    |
| <b>Precision (intermediate)</b>  |                                                                                                                                      | From six determinations of standard solution at target concentration on two different days:<br>- $\text{RSD} \leq 5.0\%$                                                                                 | RSD from day 1, instrument 1           | 0.564%                  |
|                                  |                                                                                                                                      |                                                                                                                                                                                                          | RSD from day 2, instrument 2           | 0.513%                  |
| <b>Robustness</b>                | Establishes the capacity of the analytical method to remain unaffected by minor variations in the parameters.                        | With variations in column temperature, organic solvent content, and flow rate:<br>- $\text{RSD} \leq 2.0\%$<br>- Tailing factor $\leq 2.0$<br>- Column efficiency $\geq 2000$<br>- Resolution $\geq 2.0$ | <i>Conditions</i>                      | <i>Variations</i>       |
|                                  |                                                                                                                                      |                                                                                                                                                                                                          | Column temperature                     | $\pm 2^{\circ}\text{C}$ |
|                                  |                                                                                                                                      |                                                                                                                                                                                                          | Organic solvent content                | $\pm 5\%$               |
|                                  |                                                                                                                                      |                                                                                                                                                                                                          | Flow rate                              | $\pm 1\%$               |
| <b>Solution stability</b>        | Determines the inter-day stability of the testing solutions.                                                                         | From inter-day prepared standard solution and spiked                                                                                                                                                     | Stability (days)                       | 4                       |
|                                  |                                                                                                                                      |                                                                                                                                                                                                          | RSD from standard solution             | 0.475%                  |

|                    |                                                                 |                                                                                                                                          |                                                 |                                           |
|--------------------|-----------------------------------------------------------------|------------------------------------------------------------------------------------------------------------------------------------------|-------------------------------------------------|-------------------------------------------|
|                    |                                                                 | placebo solution at target concentration:<br>- $97.0\% \leq \text{recovery} \leq 103.0\%$<br>- $\text{RSD} \leq 2.0\%$                   | RSD from spiked placebo (testosterone 0.5% gel) | 0.08%                                     |
|                    |                                                                 |                                                                                                                                          | RSD from spiked placebo (testosterone 20% gel)  | 0.851%                                    |
| <b>Specificity</b> | Forced degradation studies (thermal, acid, base and oxidation). | - No chromatogram interference<br>- 5-20% degradation in at least one stressed condition<br>- Resolution $\geq 2.0$<br>- Purity flag: no | <i>Conditions</i>                               | <i>Thermal, acid, base, and oxidation</i> |
|                    |                                                                 |                                                                                                                                          | Degradation                                     | Yes                                       |
|                    |                                                                 |                                                                                                                                          | Interference                                    | No                                        |
|                    |                                                                 |                                                                                                                                          | Resolution                                      | n/a                                       |
|                    |                                                                 |                                                                                                                                          | Purity flag                                     | No                                        |

*n/a = not applicable*

**Table S2.** The outcome of the stability study performed on testosterone 0.5% topical gel at room temperature was presented in this table. The stability study was conducted for 182 days. The physical characteristics (colour/appearance, odour, viscosity, and pH) and chemical attributes (assay and strength) were evaluated on days 0, 7, 14, 28, 42, 60, 90, 120, and 182. The preparation was stable throughout the duration of the study.

| <b>Time Point</b> | <b>Physical Characterization</b> |                |                          |           | <b>Chemical Characterization</b> |                     |                           |
|-------------------|----------------------------------|----------------|--------------------------|-----------|----------------------------------|---------------------|---------------------------|
|                   | <i>Colour/Appearance</i>         | <i>Odour</i>   | <i>Viscosity (mPa.s)</i> | <i>pH</i> | <i>Assay (mg/g)</i>              | <i>Strength (%)</i> | <i>Standard Deviation</i> |
| Day 0             | Very faint beige, smooth         | Characteristic | 1044.7                   | 5.75      | 5.014                            | 100                 | 0.871                     |
| Day 7             | Very faint beige, smooth         | Characteristic | 1086.3                   | 5.95      | 4.986                            | 99.43               | 0.926                     |
| Day 14            | Very faint beige, smooth         | Characteristic | 1081.7                   | 5.69      | 4.925                            | 98.23               | 0.801                     |
| Day 28            | Very faint beige, smooth         | Characteristic | 1092.7                   | 5.73      | 5.032                            | 100.35              | 0.817                     |
| Day 42            | Very faint beige, smooth         | Characteristic | 1091.7                   | 5.98      | 5.084                            | 101.40              | 0.498                     |
| Day 60            | Very faint beige, smooth         | Characteristic | 1099.0                   | 5.80      | 5.099                            | 101.70              | 1.010                     |
| Day 90            | Very faint beige, smooth         | Characteristic | 1146.0                   | 5.88      | 5.085                            | 101.42              | 0.878                     |
| Day 120           | Very faint beige, smooth         | Characteristic | 1108.0                   | 6.00      | 5.022                            | 100.16              | 0.768                     |
| Day 182           | Very faint beige, smooth         | Characteristic | 1059.0                   | 5.78      | 5.058                            | 100.87              | 0.784                     |

**Table S3.** The outcome of the stability study performed on testosterone 0.5% topical gel at refrigerated temperature was presented in this table. The stability study was conducted for 182 days. The physical characteristics (colour/appearance, odour, viscosity, and pH) and chemical attributes (assay and strength) were evaluated on days 0, 7, 14, 28, 42, 60, 90, 120, and 182. The preparation was stable throughout the duration of the study.

| <b>Time Point</b> | <b>Physical Characterization</b>                                |                |                          |           | <b>Chemical Characterization</b> |                     |                           |
|-------------------|-----------------------------------------------------------------|----------------|--------------------------|-----------|----------------------------------|---------------------|---------------------------|
|                   | <i>Colour/Appearance</i>                                        | <i>Odour</i>   | <i>Viscosity (mPa.s)</i> | <i>pH</i> | <i>Assay (mg/g)</i>              | <i>Strength (%)</i> | <i>Standard Deviation</i> |
| Day 0             | Very faint beige, smooth                                        | Characteristic | 1044.7                   | 5.75      | 5.011                            | 100                 | 1.050                     |
| Day 7             | Very faint beige, smooth                                        | Characteristic | 1110.0                   | 5.63      | 4.968                            | 99.13               | 0.991                     |
| Day 14            | Very faint beige, smooth                                        | Characteristic | 1035.8                   | 5.74      | 4.903                            | 97.83               | 0.644                     |
| Day 28            | Very faint beige, smooth                                        | Characteristic | 1103.3                   | 5.79      | 5.009                            | 99.96               | 0.824                     |
| Day 42            | Very faint beige, smooth                                        | Characteristic | 1079.0                   | 5.89      | 5.044                            | 100.65              | 0.711                     |
| Day 60            | Very faint beige, smooth                                        | Characteristic | 1086.3                   | 5.77      | 5.094                            | 101.65              | 0.847                     |
| Day 90            | Very faint beige, smooth                                        | Characteristic | 1168.0                   | 5.54      | 5.116                            | 102.09              | 0.714                     |
| Day 123           | Very faint beige, smooth<br>*small separation appearance on top | Characteristic | 1101.7                   | 5.80      | 5.053                            | 100.84              | 0.903                     |
| Day 182           | Very faint beige, smooth<br>*small separation appearance on top | Characteristic | 1025.2                   | 5.65      | 5.088                            | 101.53              | 0.845                     |

**Table S4.** The outcome of the stability study performed on testosterone 20% topical gel at room temperature was presented in this table. The stability study was conducted for 182 days. The physical characteristics (colour/appearance, odour, viscosity, and pH) and chemical attributes (assay and strength) were evaluated on days 0, 7, 14, 28, 42, 60, 90, 120, and 182. The preparation was stable throughout the duration of the study.

| <b>Time Point</b> | <b>Physical Characterization</b> |                |                          |           | <b>Chemical Characterization</b> |                     |                           |
|-------------------|----------------------------------|----------------|--------------------------|-----------|----------------------------------|---------------------|---------------------------|
|                   | <i>Colour/Appearance</i>         | <i>Odour</i>   | <i>Viscosity (mPa.s)</i> | <i>pH</i> | <i>Assay (mg/g)</i>              | <i>Strength (%)</i> | <i>Standard Deviation</i> |
| Day 0             | White smooth                     | Characteristic | 6595.0                   | 5.89      | 207.443                          | 100                 | 0.921                     |
| Day 7             | White smooth                     | Characteristic | 4660.7                   | 5.90      | 206.084                          | 99.34               | 0.759                     |
| Day 14            | White smooth                     | Characteristic | 5300.0                   | 5.87      | 204.484                          | 98.57               | 0.963                     |
| Day 28            | White smooth                     | Characteristic | 4774.3                   | 5.97      | 206.987                          | 99.78               | 0.825                     |
| Day 42            | White smooth                     | Characteristic | 4546.0                   | 5.93      | 211.339                          | 101.88              | 1.038                     |
| Day 60            | White smooth                     | Characteristic | 4364.0                   | 5.89      | 212.864                          | 102.61              | 1.181                     |
| Day 90            | White smooth                     | Characteristic | 3452.0                   | 5.73      | 208.850                          | 100.68              | 0.934                     |
| Day 123           | White smooth                     | Characteristic | 3848.3                   | 6.05      | 210.998                          | 101.71              | 1.007                     |
| Day 182           | White smooth                     | Characteristic | 3738.0                   | 5.67      | 210.955                          | 101.69              | 1.015                     |

**Table S5.** The outcome of the stability study performed on testosterone 20% topical gel at refrigerated temperature was presented in this table. The stability study was conducted for 182 days. The physical characteristics (colour/appearance, odour, viscosity, and pH) and chemical attributes (assay and strength) were evaluated on days 0, 7, 14, 28, 42, 60, 90, 120, and 182. The preparation was stable throughout the duration of the study.

| <b>Time Point</b> | <b>Physical Characterization</b> |                |                          |           | <b>Chemical Characterization</b> |                     |                           |
|-------------------|----------------------------------|----------------|--------------------------|-----------|----------------------------------|---------------------|---------------------------|
|                   | <i>Colour/Appearance</i>         | <i>Odour</i>   | <i>Viscosity (mPa.s)</i> | <i>pH</i> | <i>Assay (mg/g)</i>              | <i>Strength (%)</i> | <i>Standard Deviation</i> |
| Day 0             | White smooth                     | Characteristic | 6595.0                   | 5.89      | 209.908                          | 100                 | 1.276                     |
| Day 7             | White smooth                     | Characteristic | 5257.3                   | 5.76      | 207.605                          | 98.90               | 1.244                     |
| Day 14            | White smooth                     | Characteristic | 5733.7                   | 5.91      | 208.040                          | 99.11               | 0.773                     |
| Day 28            | White smooth                     | Characteristic | 6088.3                   | 5.97      | 209.924                          | 100.01              | 0.509                     |
| Day 42            | White smooth                     | Characteristic | 5925.3                   | 5.93      | 214.110                          | 102.00              | 1.155                     |
| Day 60            | White smooth                     | Characteristic | 4932.7                   | 6.05      | 213.147                          | 101.54              | 1.182                     |
| Day 90            | White smooth                     | Characteristic | 4469.3                   | 5.79      | 209.055                          | 99.59               | 1.383                     |
| Day 123           | White smooth                     | Characteristic | 4548.0                   | 5.93      | 209.733                          | 99.92               | 0.912                     |
| Day 182           | White smooth                     | Characteristic | 3933.7                   | 5.74      | 209.300                          | 99.71               | 1.215                     |

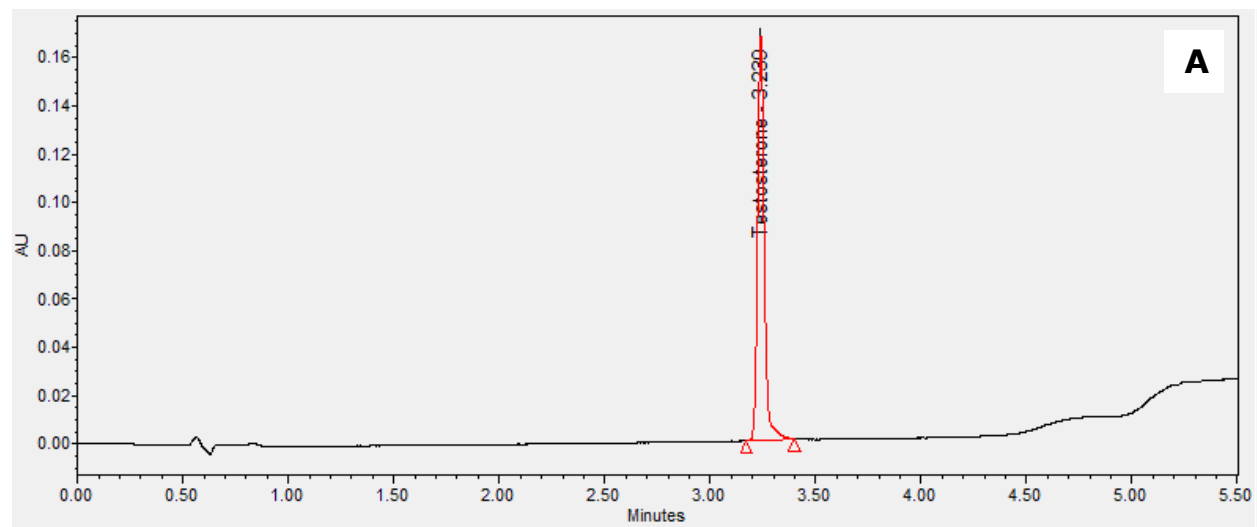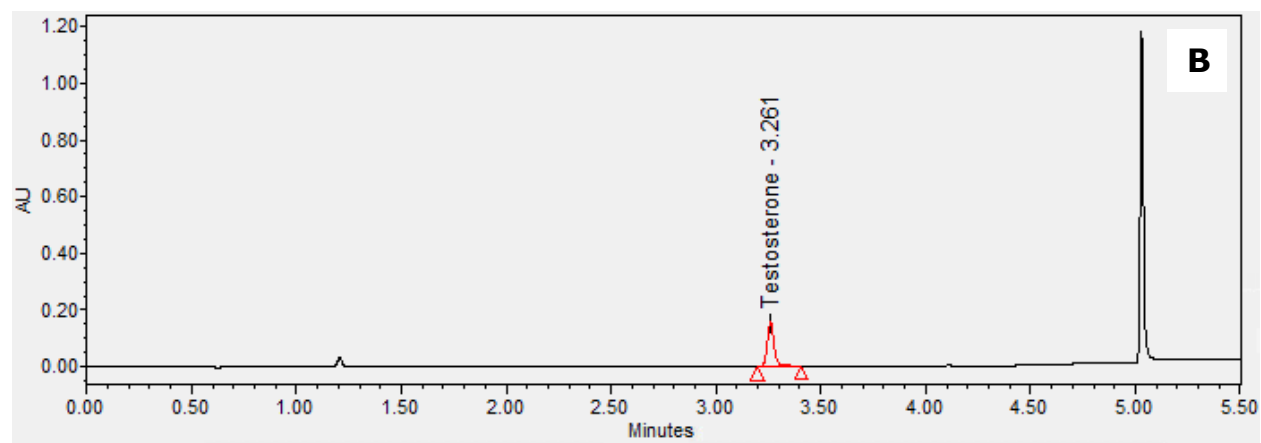



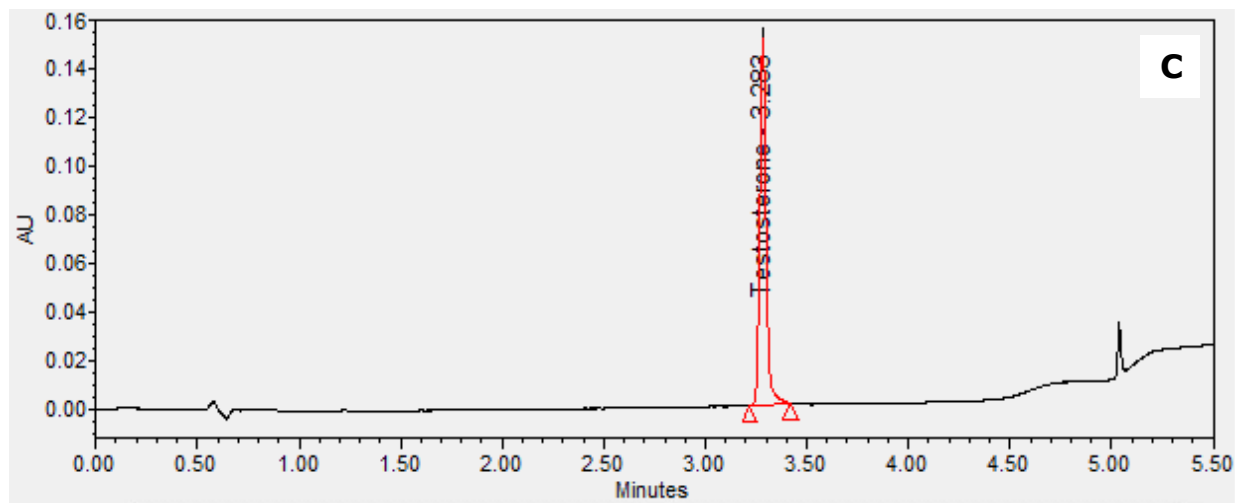

**Figure S1.** UPLC-PDA chromatograms (absorbance units vs. time) derived at 245 nm of testosterone in methanol (A) testosterone 0.5% topical gel (B); and testosterone 20% topical gel (C). The retention time of testosterone in this UPLC method was at about 3.25 minutes.
